# Supplementary material
Source: publisher site journal article supplement (https://www.dovepress.com/article/474100)
Supplement: Supplementary file 1 [file get_supplementary_file.php]

**Accuracy of diagnosing optic neuritis using DANTE T1-SPACE imaging**

**Running head: Diagnosing optic neuritis with DANTE T1-SPACE**

Ayaka Shimada1)2), Kenji Suda1), Eri Nakano1), Miho Tagawa1), Manabu Miyata1), Satoshi Kashii1), Takuya Hinoda3), Yasutaka Fushimi3), Kimitoshi Kimura4), Ryusei Nishigori4), Sinyeob Ahn5), John Grinstead6), and Akitaka Tsujikawa1)

1) Department of Ophthalmology and Visual Sciences, Kyoto University Graduate School of Medicine, Kyoto, Kyoto, Japan

2) Department of Ophthalmology, Shimane University Faculty of Medicine, Izumo, Shimane, Japan

3) Department of Diagnostic Imaging and Nuclear Medicine, Kyoto University Graduate School of Medicine, Kyoto, Kyoto, Japan

4) Department of Neurology, Kyoto University Graduate School of Medicine, Kyoto, Kyoto, Japan

5) MR Research and Development, Siemens Healthineers, San Francisco, CA, USA

6) MR Research and Development, Siemens Healthineers, Portland, OR, USA

**Corresponding author:** Kenji Suda, MD, PhD

Department of Ophthalmology and Visual Sciences, Kyoto University Graduate School of Medicine, 54 Shougoin Kawahara-cho, Sakyo-ku, Kyoto 606-8507, Japan

Tel: +81-75-751-3248; Fax: +81-75-752-0933; Email: qwm04525@kuhp.kyoto-u.ac.jp

**Supplemental Table 1.** Comparison of clinical characteristics between the groups showing better and worse BCVA after treatment.

|  | Group with better BCVA  after treatment (12 eyes) | Group with worse BCVA  after treatment (9 eyes) | P value |
| --- | --- | --- | --- |
| Lesion length evaluated by DANTE sequence (mm) | 15.5 ± 10.4 | 15.1 ± 9.7 | 0.94 |
| BCVA at first visit | 1.02 ± 1.01 | 1.57 ± 0.90 | 0.19 |
| BCVA after treatment (logMAR) | -0.14 ± 0.05 | 0.54 ± 0.84 | 0.015 |
| Disc swelling (%) | 6 (50) | 6 (67) | 0.66 |
| GCC thickness at the first visit (μm) | 100.9 ± 10.0 | 90.3 ± 14.3 | 0.1 |
| GCC thickness at 1 month after treatment (μm) | 91.1 ± 7.0 | 76.3 ± 13.2 | 0.018 |
| GCC thickness at the last visit (μm) | 84.1 ± 7.8 | 68.0 ± 11.3 | 0.01 |
| cpRNFL thickness at the first visit (μm) | 125.4 ± 45.1 | 126.4 ± 56.9 | 0.96 |
| cpRNFL thickness at 1 month after treatment (μm) | 100.9 ± 15.5 | 96.0 ± 21.7 | 0.62 |
| cpRNFL thickness at the last visit (μm) | 81.0 ± 16.9 | 74.0 ± 9.3 | 0.37 |
| AQP4-Ab (%) | 0 (0) | 5 (56) | 0.006 |
| MOG-Ab (%) | 7 (58) | 1 (11) | 0.067 |
| Interval from the onset to the MRI scan (days) | 8.8 ± 7.1 | 17.2 ± 16.4 | 0.15 |

Participants were divided into two groups based on the BCVA (logMAR) after treatment

AQP4-Ab, anti-aquaporin-4 antibody; BCVA, best-corrected visual acuity; cpRNFL, circumpapillary retinal nerve fiber layer; DANTE, delay alternating with nutation for tailored excitation; GCC, ganglion cell complex; logMAR, logarithm of the minimum angle of resolution; MOG-Ab, anti-myelin oligodendrocyte glycoprotein antibody; MRI, magnetic resonance imaging.

**Supplemental Table 2.** Comparison of clinical characteristics among anti-AQP4 positive, anti-MOG, and seronegative patients

|  | Seronegative (8 eyes) | Anti-AQP4-positive (5 eyes) | Anti-MOG-positive (8 eyes) |
| --- | --- | --- | --- |
| Length with high signal in DANTE (mm) | 16.99 ± 10.89 | 11.4 ± 5.95 | 15.19 ± 10.14 |
| BCVA at first visit | 0.95 ± 0.87 | 1.97 ± 0.92 | 1.13 ± 0.95 |
| BCVA after treatment | 0.0038 ± 0.17 | 0.84 ± 1.03 | -0.14 ± 0.08 |
| Disc swelling (%) | 3 (60) | 3 (60) | 5 (63) |
| GCC thickness at first visit (μm) | 93.67 ± 10.50 | 83.8 ± 21.54 | 103.0 ± 8.71 |
| GCC thickness at 1 month after treatment (μm) | 80.5 ± 11.86 | 73.5 ± 11.90 | 92.6 ± 5.72 |
| GCC thickness at last visit (μm) | 81.17 ± 9.99 | 59.75 ± 6.75 | 78.1 ± 11.0 |
| cpRNFL thickness at first visit (μm) | 109.57 ± 26.45 | 136.0 ± 73.52 | 134.0 ± 39.26 |
| cpRNFL thickness at 1 month after treatment (μm) | 84.33 ± 9.84 | 95.80 ± 24.23 | 106.7 ± 11.73 |
| cpRNFL thickness at last visit (μm) | 77.20 ± 7.86 | 58.00 ± 12.00 | 73.25 ± 21.37 |
| Days from the onset to the MRI (days) | 10.6 ± 7.6 | 25.2 ± 18.5 | 6.3 ± 3.1 |

AQP4, anti-aquaporin-4; BCVA, best-corrected visual acuity; cpRNFL, circumpapillary retinal nerve fiber layer; GCC, ganglion cell complex; MOG, anti-myelin oligodendrocyte glycoprotein; MRI, magnetic resonance imaging.
